# Supplementary material for: A stable single-atom Zn catalyst synthesized by a ligand-stabilized pyrolysis strategy for selective oxidation of C–H bonds
Source: Royal Society of Chemistry journal article supplement (doi:10.1039/d2gc01831d), 2022-01-01
Supplement: d2gc01831d1.pdf [file d2gc01831d1.pdf]

## Supplementary Information

### **Stable Single-atom Zn Catalyst Synthesized by Ligand-stabilized Pyrolysis Strategy for Selective Oxidation of C-H Bond**

Wenhui Wang,<sup>a#</sup> Ningzhao Shang,<sup>a##</sup> Junmin Wang,<sup>a</sup> XinhaoNie,<sup>a</sup> Congcong Du,<sup>b</sup> Xin Zhou,<sup>a</sup> Xiang Cheng,<sup>a</sup> Wei Gao,<sup>a</sup> Xue Liu,<sup>a</sup> Jianyu Huang,<sup>b</sup> YuqingQiao,<sup>c\*</sup> ShutaoGao,<sup>a\*</sup> and Chun Wang<sup>a</sup>

<sup>a</sup>*College of Science, Hebei Agricultural University, Baoding 071001, China*

<sup>b</sup>*Clean Nano Energy Center, State Key Laboratory of Metastable Materials Science and Technology, Yanshan University, Qinhuangdao 066004, China*

<sup>c</sup>*College of Environmental and Chemical Engineering, Yanshan University, Qinhuangdao 066004, China*

## 1. Characterization

The X-ray diffraction (XRD) patterns of the catalysts were recorded on a Rigaku B/Max-RB X-ray diffractometer with nickel-filtrated Cu K $\alpha$  radiation, and operating in a 2 $\theta$  range of 10-70° at scan step of 0.017°. A T.J.A. ICP-9000 type instrument was employed to detect the Zn contents of as-prepared catalysts by inductively coupled plasma optical emission spectrometer (ICP-OES). X-ray photoelectron spectroscopy (XPS) was conducted with a VG Scientific ESCALAB210-XPS photoelectron spectrometer with an Al K $\alpha$  X-ray source. The XAFS spectra were obtained at 1W1B station in BSRF (Beijing Synchrotron Radiation Facility, P. R. China) operated at 2.5 GeV with a maximum current of 250 mA. XAS measurements at the Co K-edge were performed in fluorescence mode using a Lytle detector. All the single atom catalysts were characterized by high-angle annular dark-field scanning transmission electron microscopy (HAADF-STEM). Atomic resolution HAADF-STEM images were obtained by using a Titan 80-300 scanning/transmission electron microscope operated at 300 kV, equipped with a probe spherical aberration corrector. The surface area and porous properties of the samples were determined by nitrogen adsorption-desorption experiment using V-Sorb 2800P volumetric adsorption equipment (Jinaipu, China).

## 2. Calculation details

DFT calculations were carried out using the “Vienna ab initio simulation package” (VASP5.3)<sup>1</sup> The Perdew–Burke–Ernzerhof (PBE) exchange-correlation functional was used within the spin-polarized generalized gradient approximation (GGA).<sup>2</sup> A plane-wave basis set was employed within the framework of the projector augmented wave (PAW) method.<sup>3</sup> In order to get accurate results, the cutoff was set to 450 eV. A Gaussian smearing was used with a smearing width of 0.2 eV. Geometry relaxations were carried out until the residual forces on each ion were smaller than 0.02 eV/Å.

The Brillouin zone was sampled using a Monkhorst-pack 3 $\times$ 3 $\times$ 1 k-point grid for ZnN<sub>4</sub>. The two-dimensional system of nitrogen-doped carbon was modeled with a 6 $\times$ 6 supercell consisted of 66 carbon sites. Two neighboring carbon atoms were removed to anchor a Zn atom, and four of carbon atoms were replaced by N atom, forming the Zn-N<sub>4</sub> configuration, Fig. S1 (a). A Zn<sub>26</sub> nanocluster structure was built to simulate Zn nanoparticles Fig. S1 (b). The stability of adsorbed species can be described by the differential adsorption energy  $\Delta E$ , which is defined as

$$\Delta E_{\text{ad}} = E(\text{surface} + \text{A}^*) - E(\text{surface}) - E_{\text{A}}$$

where  $E(\text{surface}+\text{A}^*)$  is the total energy for the adsorbed species adsorbed on the catalysts surfaces,  $E(\text{surface})$  refers to the catalysts surfaces, and  $E_{\text{A}}$  is the energy for adsorbed species. The  $\Delta E_{\text{ad}}$  was obtained from the ground state calculations. With this definition, a negative value indicates an exothermic adsorption.

### 3. Calculation of the EB conversion, acetophenone selectivity and TOF

The conversion of hydrocarbons was calculated by the following equations:

$$\text{Conversion} = \left( 1 - \frac{\text{mole of substrate after reaction}}{\text{mole of substrate before reaction}} \right) \times 100\%$$

The selectivity of hydrocarbons were calculated by the following equations:

$$\text{Selectivity} = \frac{\text{mole of desired product}}{\text{mole of substrate before reaction} - \text{mole of substrate after reaction}}$$

The turnover frequency (TOF) based on total Zn was calculated by the following equations:

$$\text{TOF} = \frac{\text{the moles of converted substrate}}{\text{the moles of active metal atoms} \times \text{times}}$$

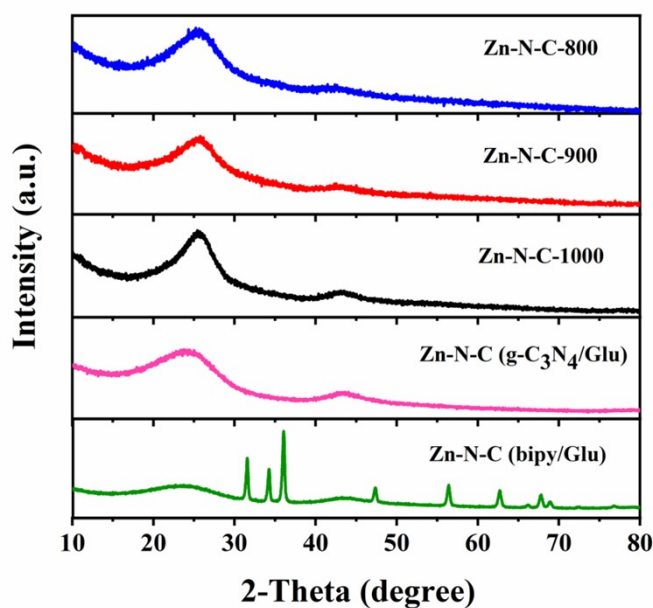

**Fig. S1.** XRD patterns of Zn-N-C-800, Zn-N-C-900, Zn-N-C-1000, Zn-N-C (g-C<sub>3</sub>N<sub>4</sub>/Glu), Zn-N-C (bipy/Glu).

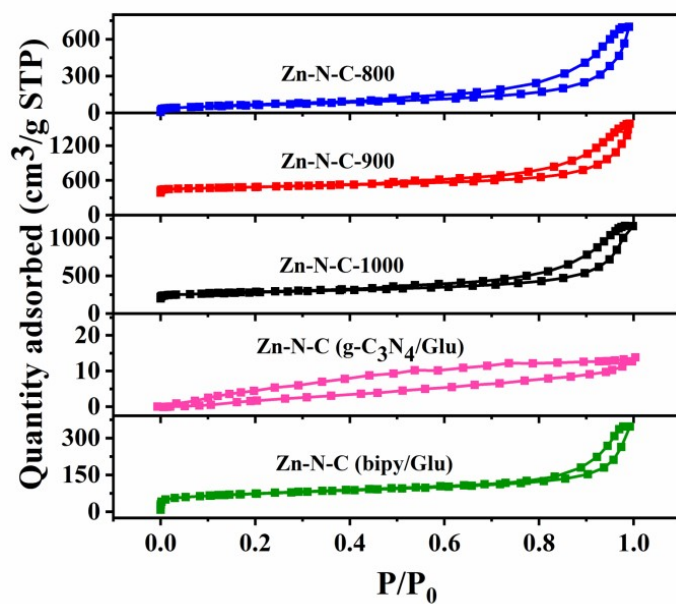

**Fig. S2.** N<sub>2</sub> adsorption–desorption isotherms of Zn-N-C-800, Zn-N-C-900, Zn-N-C-1000, Zn-N-C (g-C<sub>3</sub>N<sub>4</sub>/Glu), Zn-N-C (bipy/Glu).

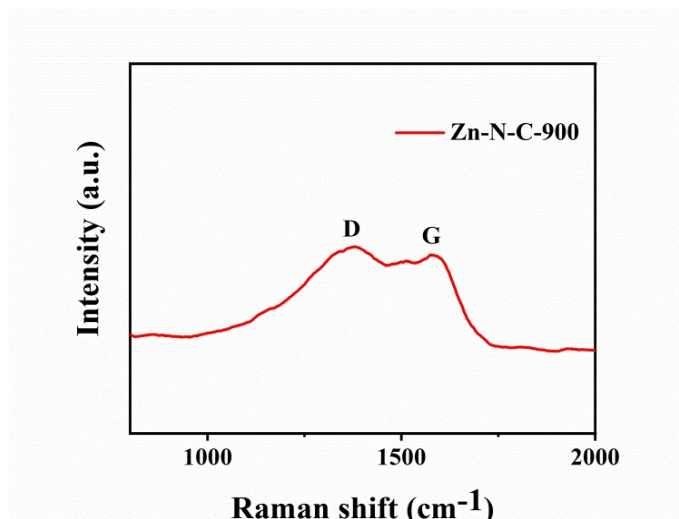

**Fig. S3.** Raman patterns of Zn-N-C-900.

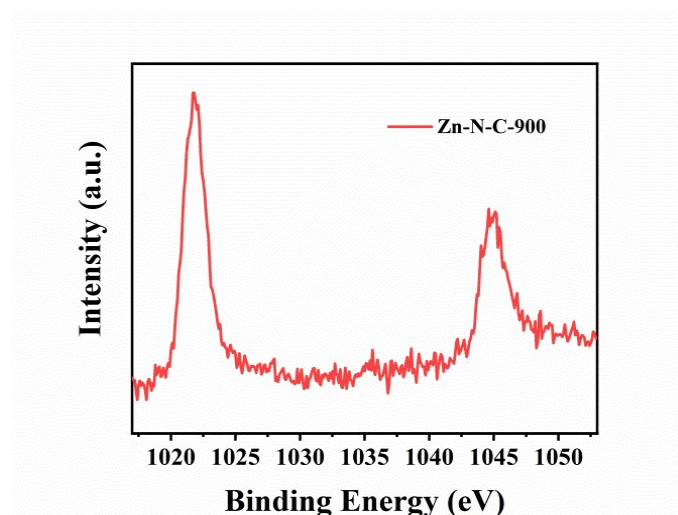

**Fig. S4.** Zn 2p spectra of Zn-N-C-900.

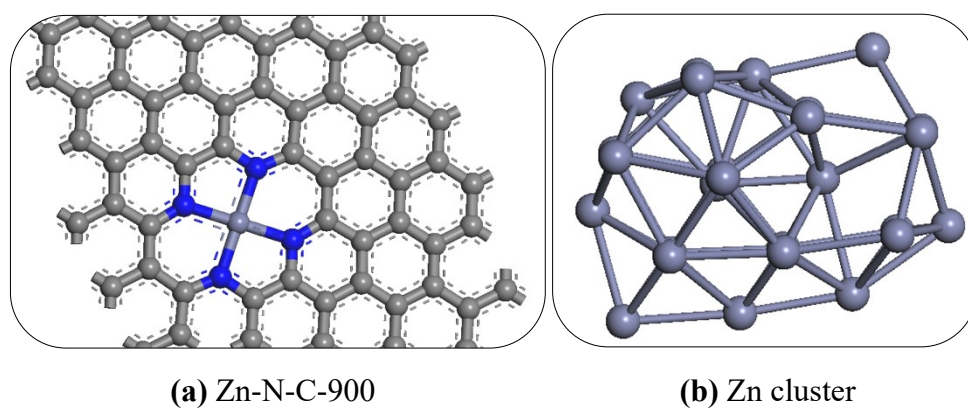

**Fig. S5.** Optimized configuration of (a) ZnN<sub>4</sub> sites in Zn-N-C-900 and (b) Zn cluster.

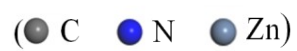

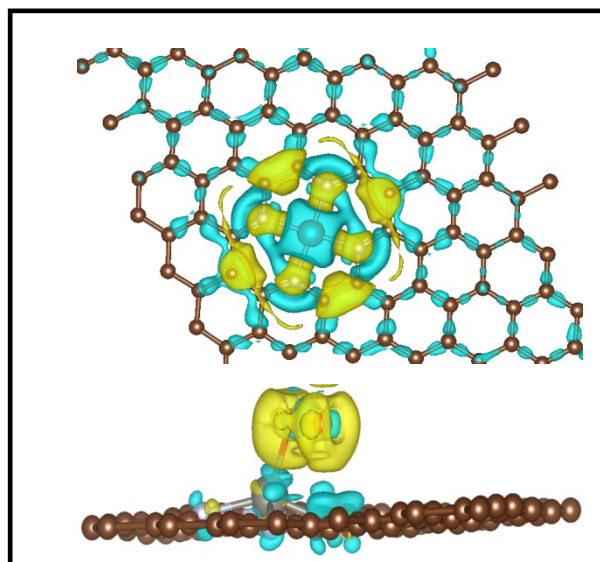

**Fig. S6.** Plots of charge density difference of Zn-N<sub>4</sub> sites at isosurfaces value  $3.0 \times 10^{-3} e/\text{Bohr}^3$ . (yellow is charge accumulation and blue is charge depletion)

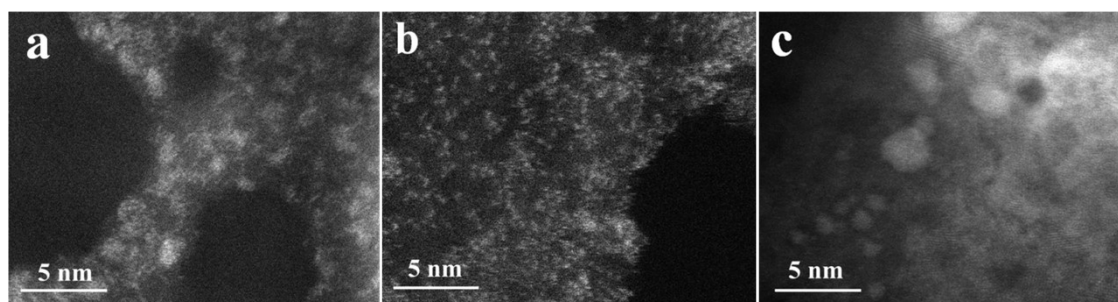

**Fig. S7.** HAADF-STEM images of (a) Zn-N-C-800, (b) Zn-N-C-900 and (c) Zn-N-C-1000.

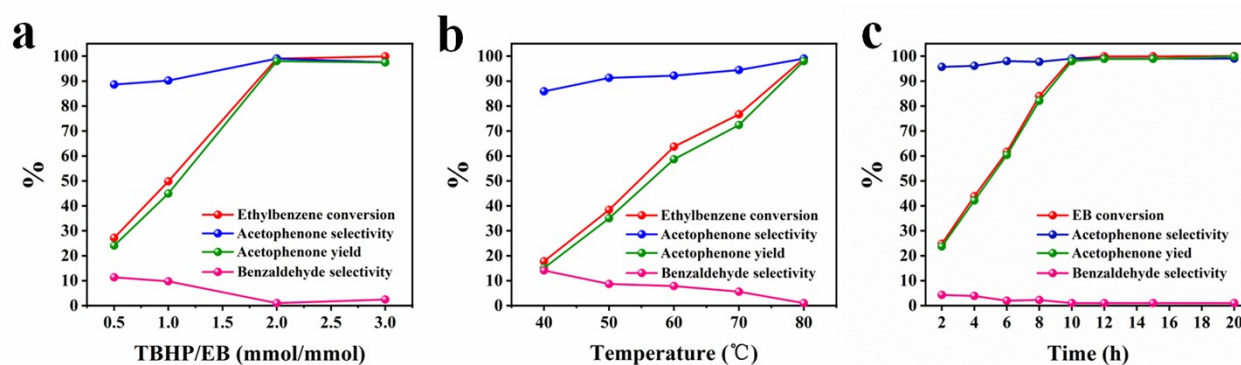

**Fig. S8.** Optimization of the reaction conditions for the selective oxidation of ethylbenzene reaction over Zn-N-C-900. (a) Effect of the TBHP amount: 30 mg of Zn-N-C-900, 3 mmol of EB, 10 h, 80 °C, air atmosphere. (b) Effect of the reaction time: 30 mg of Zn-N-C-900, 3 mmol of EB, 70 wt % TBHP aqueous solution (2 equiv), 80 °C, air atmosphere. (c) Effect of the reaction temperature: 30 mg of Zn-N-C-900, 3 mmol of EB, 70 wt % TBHP aqueous solution (2 equiv), 10 h, air atmosphere.

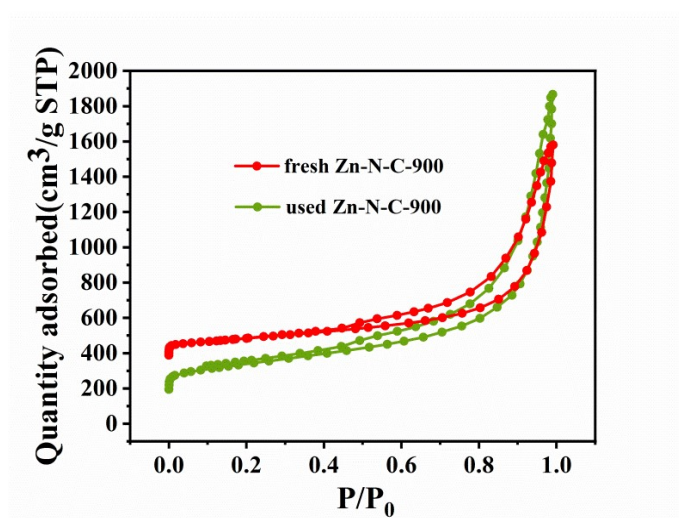

**Fig. S9.** Nitrogen adsorption-desorption isotherms of fresh Zn-N-C-900 and recycled Zn-N-C-900.

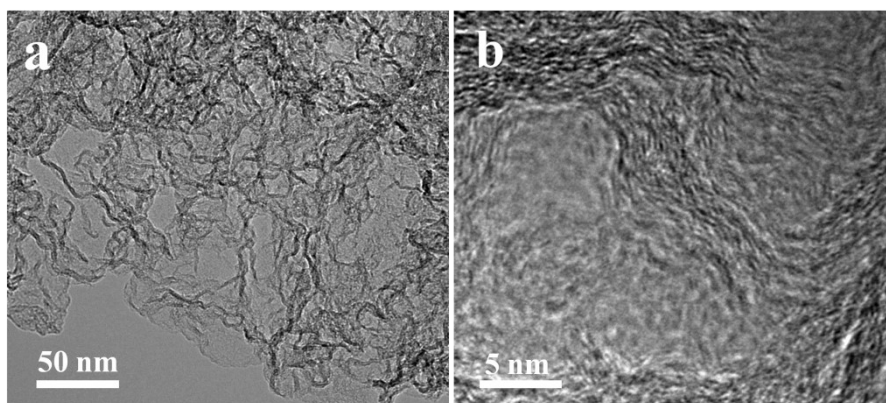

**Fig. S10.** TEM image (a) and HRTEM image (b) of recycled Zn-N-C-900.

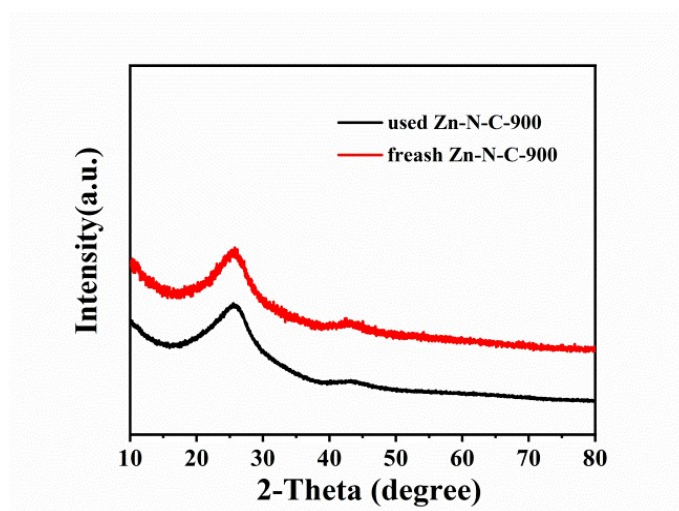

**Fig. S11.** XRD patterns of fresh Zn-N-C-900 and recycled Zn-N-C-900.

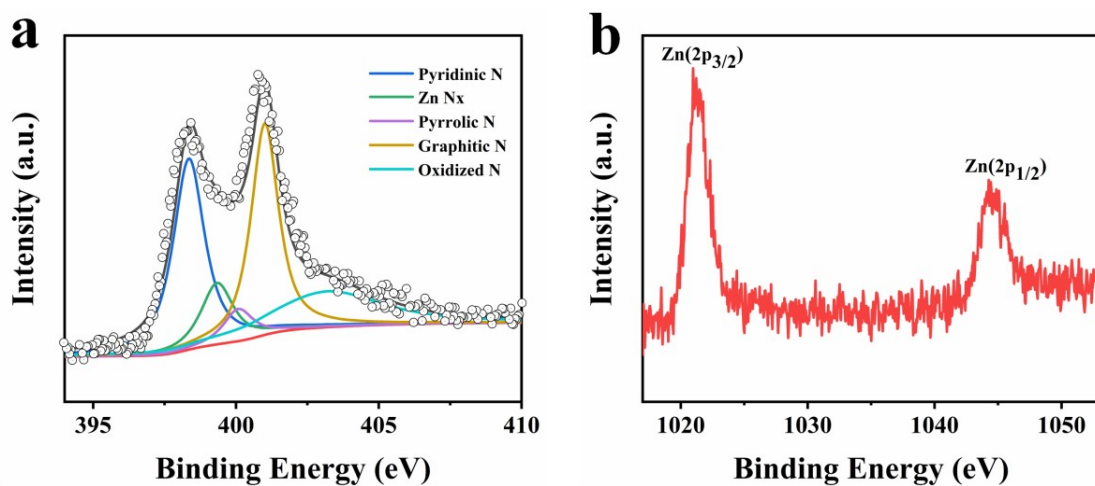

**Fig. S12.** N1s (a) and Zn 2p (b) spectra of the recycled Zn-N-C-900.

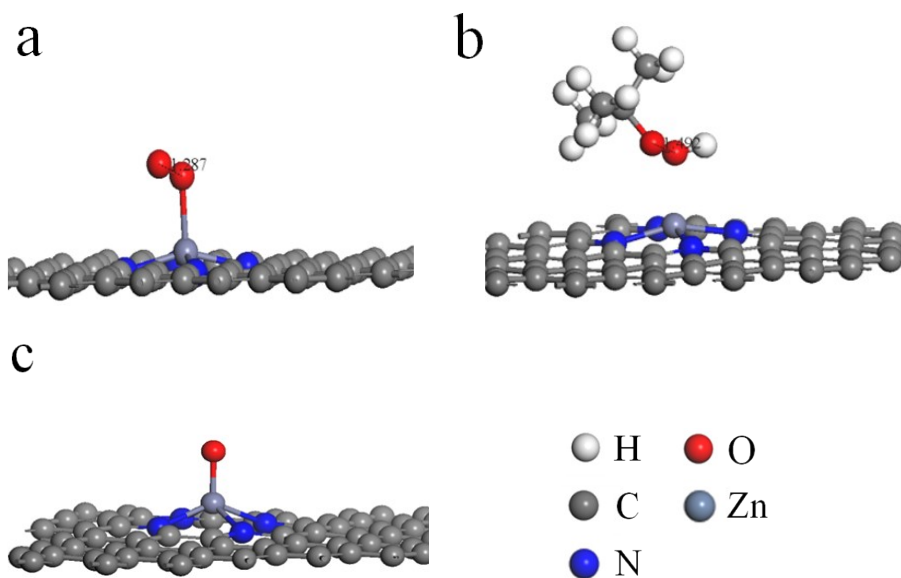

**Fig. S13.** Optimized configuration of O<sub>2</sub> (a) and TBHP (b) on Zn-N<sub>4</sub> sites, (c) optimized configuration of ZnN<sub>4</sub>O.



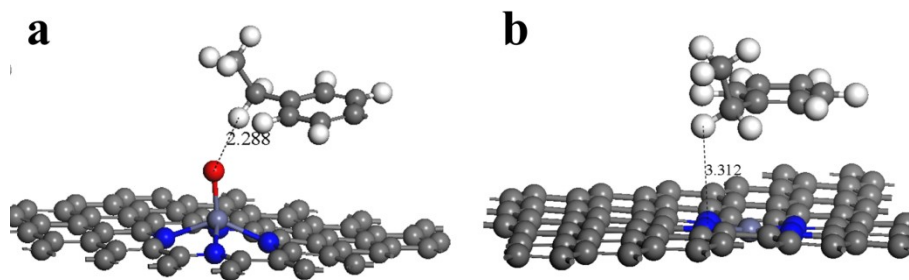

**Fig. S14.** Optimized configuration of ethylbenzene on  $\text{ZnN}_4\text{O}$  (a) and  $\text{Zn-N}_4$  (b) sites.

**Table S1.** The results of  $\text{N}_2$  adsorption–desorption measurements.

| Entry | Sample                                         | BET <sup>a</sup>          | Pore volume <sup>b</sup>   | Pore size <sup>c</sup> |
|-------|------------------------------------------------|---------------------------|----------------------------|------------------------|
|       |                                                | ( $\text{m}^2/\text{g}$ ) | ( $\text{cm}^3/\text{g}$ ) | (nm)                   |
| 1     | Zn-N-C-800                                     | 331                       | 1.57                       | 17.89                  |
| 2     | Zn-N-C-900                                     | 603                       | 2.69                       | 19.10                  |
| 3     | Zn-N-C-1000                                    | 376                       | 1.96                       | 18.15                  |
| 4     | NC-900                                         | 107                       | 0.57                       | 17.50                  |
| 5     | Zn-N-C (g- $\text{C}_3\text{N}_4/\text{Glu}$ ) | 115                       | 0.33                       | 11.75                  |
| 6     | Zn-N-C (bipy/Glu)                              | 81                        | 0.04                       | 7.07                   |

<sup>a</sup>BET Surface Area, <sup>b</sup>BJH Adsorption cumulative volume, <sup>c</sup>BJH Median pore width.

**Table S2.** The relative concentrations of different N species based on XPS of the all samples.

| Catalyst                                       | Total N<br>(atom %) | Relative concentrations of different N species( area%) |                   |            |             |         |
|------------------------------------------------|---------------------|--------------------------------------------------------|-------------------|------------|-------------|---------|
|                                                |                     | Pyridinic N                                            | Zn-N <sub>x</sub> | Pyrrolic N | Graphitic N | N-oxide |
| Zn-N-C-800                                     | 16.69               | 51.05                                                  | 14.56             | 10.08      | 18.83       | 5.47    |
| Zn-N-C-900                                     | 9.01                | 25.14                                                  | 15.35             | 8.65       | 35.32       | 15.53   |
| Zn-N-C-1000                                    | 7.49                | 24.42                                                  | 13.09             | 7.25       | 36.95       | 18.28   |
| NC-900                                         | 7.90                | 19.12                                                  | -                 | 14.15      | 51.83       | 14.89   |
| Zn-N-C (g- $\text{C}_3\text{N}_4/\text{Glu}$ ) | 6.94                | 27.35                                                  | 11.20             | 17.88      | 25.90       | 17.66   |
| Zn-N-C (bipy/Glu)                              | 3.38                | 33.01                                                  | 8.06              | 28.55      | 26.48       | 3.89    |

**Table S3.** Structural parameters extracted from the Zn *K*-edge EXAFS fitting. ( $S_0^2=0.84$ )

| Scattering pair | Bond length (Å) | CN            | $\sigma^2$ (Å)    | $E_0$ shift (eV) |
|-----------------|-----------------|---------------|-------------------|------------------|
| Zn-N(O)         | $1.99 \pm 0.01$ | $4.2 \pm 0.4$ | $0.007 \pm 0.003$ | 3.6              |

CN is the coordination number;  $\sigma^2$  is Debye-Waller factor (a measure of thermal and static disorder in absorber-scatter distances);  $E_0$  is edge energy shift.

**Table S4.** ICP-OES analysis result for the Zn contents in Zn-N-C-900 by before and after use.

| catalyst         | Zn contents (wt.%) |
|------------------|--------------------|
| fresh Zn-N-C-900 | 2.27               |
| used Zn-N-C-900  | 2.08               |

**Table S5.** The relative concentrations of different N species based on XPS of the fresh Zn-NC-900 and used Zn-NC-900.

| Catalyst         | Total N (atom %) | Relative concentrations of different N species (area %) |                   |            |             |         |
|------------------|------------------|---------------------------------------------------------|-------------------|------------|-------------|---------|
|                  |                  | Pyridinic N                                             | Zn-N <sub>x</sub> | Pyrrolic N | Graphitic N | N-oxide |
| fresh Zn-N C-900 | 9.01             | 25.14                                                   | 15.35             | 8.65       | 35.32       | 15.53   |
| used Zn-N C-900  | 8.84             | 28.76                                                   | 14.52             | 5.28       | 32.21       | 21.85   |

**Table S6.** Comparison for catalytic performance of the Zn-N-C-900 with the reported catalysts in references

| Entry | Ethylbenzene | Catalysts                                                                   | Oxidant       | Solvents                                                          | T (°C) / Time(h) | Con.(%) / Sel.(%) | Cycles | Refs.     |
|-------|--------------|-----------------------------------------------------------------------------|---------------|-------------------------------------------------------------------|------------------|-------------------|--------|-----------|
| 1     | 3 mmol       | Zn-N-C-900 (30 mg)                                                          | 6 mmol TBHP   | 0.23 mL H <sub>2</sub> O                                          | 80 / 10          | 99 / 99           | 15     | this work |
| 2     | 1 mmol       | Pd-(4wt%)/g-C <sub>3</sub> N <sub>4</sub> (10 mg)                           | 4 mmol TBHP   | 5 mL C <sub>2</sub> H <sub>3</sub> N                              | 80 / 24          | 67 / 97           | 5      | 4         |
| 3     | 0.1 mmol     | CIPC-750                                                                    | 0.3 mmol TBHP | 2 mL C <sub>2</sub> H <sub>3</sub> N                              | 80 / 12          | 58.7 / >95        | 3      | 5         |
| 4     | 10 mmol      | Co <sub>1</sub> Zn <sub>99</sub> -ZIF-800-H <sub>2</sub> (5 mg)             | 2.8 mmol TBHP | 3 mL H <sub>2</sub> O                                             | 60 / 17          | 57 / 93.1         | 4      | 6         |
| 5     | 1 mmol       | Co-MnO@CN-700/15 (15 mg)                                                    | 0.5 mL TBHP   | 5 mL H <sub>2</sub> O                                             | 50 / 6           | >99.9 / 99.9      | 7      | 7         |
| 6     | 1 mmol       | Co-N-C-10 (15 mg)                                                           | 3.5 mmol TBHP | 3 mL H <sub>2</sub> O                                             | 80 / 6           | 93 / 100          | 5      | 8         |
| 7     | 120 μL       | Co-N-C-900/PCMk (15 mg)                                                     | 490 μL TBHP   | 3 mL H <sub>2</sub> O                                             | 80 / 12          | 96 / 99           | 5      | 9         |
| 8     | 0.5 mmol     | CoTMPP-500 (5 mg)                                                           | 500 μL TBHP   | 1 mL H <sub>2</sub> O                                             | 80 / 6           | 91.9 / 97.5       | 3      | 10        |
| 9     | 1 mmol       | Co-N-C-9 (15 mg)                                                            | 3.5 mmol TBHP | H <sub>2</sub> O                                                  | 80 / 12          | 96.5 / 97.3       | 5      | 11        |
| 10    | 0.5 mmol     | SNC-Ca-850 (10 mg)                                                          | 2 mmol TBHP   | 2 mL H <sub>2</sub> O                                             | 80 / 4           | 92.4 / 97.4       | 4      | 12        |
| 11    | 1 mmol       | GS1000 (10 mg)                                                              | 1 mL TBHP     | 2 mL H <sub>2</sub> O                                             | 80 / 6           | >99 / >99         | 5      | 13        |
| 12    | 0.5 mmol     | Fe-ISAS/CN (20 mg)                                                          | 1 mL TBHP     | 2 mL H <sub>2</sub> O                                             | 60 / 24          | 99 / 99           | 5      | 14        |
| 13    | 0.1 mmol     | SACo@g-C <sub>3</sub> N <sub>4</sub> (5 mg)                                 | 0.5 mmol PMS  | 10 mL<br>C <sub>2</sub> H <sub>3</sub> N / H <sub>2</sub> O 1 : 1 | 60 / 24          | 97.5 / 95.6       | 4      | 15        |
| 14    | 0.25 mmol    | Fe <sub>1</sub> /NC (20 mg)                                                 | 1 mL TBHP     | 2 mL H <sub>2</sub> O                                             | 35 / 48          | 97 / 99           | 5      | 16        |
| 15    | 5 mL         | Co <sub>1.5</sub> Ni <sub>1.5</sub> Al <sub>1</sub> O <sub>x</sub> (200 mg) | 15 mL TBHP    | 10 mL Acetic acid                                                 | 120 / 8          | 73.7 / 85.1       | 4      | 17        |

## Reference

1. K. B. John P. Perdew and Matthias Ernzerhof, *Phys. Rev. Lett*, 1996, **77**, 3865.
2. P. E. Blochl, *Phys. Rev. B*, 1994, **50**, 17953-17979.
3. G. Kresse and D. Joubert, *Phys. Rev. B*, 1999, **59**, 1758
4. S. Nilforoushan, M. Ghiaci, S. M. Hosseini, S. Laurent and R. N. Muller, *New J. Chem*, 2019, **49**, 6921-6931
5. Z. Wang, Y. Jiang, Y. Li, H. Huo, T. Zhao, D. Li, K. Lin and X. Xu, *Chem*, 2019, **25**, 4175-4183.
6. R. Nie, J. Chen, M. Chen, Z. Qi, T.-W. Goh, T. Ma, L. Zhou, Y. Pei and W. Huang, *Green Chem*, 2019, **21**, 1461-1466.
7. K. Wang, S. Zhao, L. Ma, M. Yang, J. Qin, X. Huang, L. Gong, Y. Xiong and R. Li, *Org. Chem. Front*, 2019, **6**, 3270-3287.
8. L. Zhang, S. Jie and Z. Liu, *New J. Chem*, 2019, **43**, 7275-7281.
9. L. Zhang, S. Jie, N. Cheng and Z. Liu, *ACS Sustain Chem. Eng*, 2019, **7**, 19474-19482.
10. Z. Y. Wu, M. X. Chen, S. Q. Chu, Y. Lin, H. W. Liang, J. Zhang and S. H. Yu, *iScience*, 2019, **15**, 282-290.
11. C. Shen, S. Jie, H. Chen and Z. Liu, *Front. Chem*, 2019, **7**, 426.
12. Y. Qin, H. Guo, B. Wang, J. Li, R. Gao, P. Qiu, M. Sun and L. Chen, *Chem. Asian J*, 2019, **14**, 1535-1540.
13. X. Hu, Y. Liu, H. Huang, B. Huang, G. Chai and Z. Xie, *Green Chem*, 2020, **22**, 1291-1300.
14. S. Wei, Y. Wang, W. Chen, Z. Li, W.-C. Cheong, Q. Zhang, Y. Gong, L. Gu, C. Chen, D. Wang, Q. Peng and Y. Li, *Chem. Sci*, 2020, **11**, 786-790.
15. J. Li, S. Zhao, S.-Z. Yang, S. Wang, H. Sun, S. P. Jiang, B. Johannessen and S. Liu, *J. Mater. Chem. A*, 2021, **9**, 3029-3035.
16. Y. Cheng, Q. Sun, L. Huang, Q. He, H. Zhang, P. Wang, Y. Zhang, S. Shi, X. Zhang, T. Gan, X. He and H. Ji, *Dalton T*, 2021, **50**, 11711-11715.
17. D. Ji, N. Xi, G. Li, P. Dong, H. Li, H. Li, C. Li, P. Wang and Y. Zhao, *Mol. Catal*, 2021, **508**, 111579.
